# Supplementary material for: Expansion of CD10neg neutrophils and CD14+HLA-DRneg/low monocytes driving proinflammatory responses in patients with acute myocardial infarction
Source: eLife journal article supplement (doi:10.7554/elife.66808), 2021-07-22
Supplement: supp [file elife_poa_e66808_Figure_1_source_data_1.xlsx]

## Sheet: Figure 1-figure supplement 2B
ACS	CD14+HLA-DRneg/low (%)	Intermediate Monocytes (%)	Non-Classical Monocytes (%)
UA	1.36	15.81	5.11
UA	1.65	16.55	6.01
UA	3.53	21.44	8.05
UA	2.6	53.87	8.85
UA	7.95	41.25	11.69
UA	3.1	48.63	7.91
UA	1.75	43.45	9.83
UA	7.3	27.5	10.43
UA	1.08	22.35	6.99
UA	3.46	52.47	11.53
UA	1.36	61.64	13.93
NSTEMI	1.67	19.56	10.25
NSTEMI	3.55	29.61	6.56
NSTEMI	17.77	41.69	12.12
NSTEMI	17.74	11.73	7.43
NSTEMI	2.39	15.86	6.51
NSTEMI	17.32	24.84	15.93
NSTEMI	13.15	25.29	23.56
NSTEMI	3.15	16.16	10.73
NSTEMI	0.23	42.16	12.66
NSTEMI	11.46	16.25	7.48
NSTEMI	6.52	29.8	5
NSTEMI	11.2	39.95	2.86
NSTEMI	2.9	20.39	7.82
NSTEMI	13.46	10.98	8.17
NSTEMI	3.38	16.34	4.49
NSTEMI	2.22	65.14	6.6
STEMI	9.29	28.92	13.68
STEMI	23.26	23.91	5.67
STEMI	2.87	46.89	6.15
STEMI	17.93	62.75	9.62
STEMI	9.1	29.06	23.26
STEMI	16.37	50.6	12.78
STEMI	13.93	52.56	19.59
STEMI	3.47	25.26	13.62
STEMI	19.05	19.4	11.53
STEMI	7.76	9.61	9.95
STEMI	5.71	25.8	14.41
STEMI	11.64	8.91	8.5
STEMI	12.19	27.73	9.9
STEMI	16.89	22.56	6.28
STEMI	15.17	21.78	10.28
STEMI	6.03	15.48	9.04
STEMI	1.2	6.41	3.09
STEMI	7.87	56.53	16.51
STEMI	6.32	35.16	12.24
STEMI	12.78	66.42	13.83
STEMI	28.65	42.08	13.3
STEMI	18.35	9.03	3.37
STEMI	6.28	39.95	13.51
STEMI	4.58	30.62	10.55
STEMI	11.02	57.86	11.68
STEMI	2.51	47.38	12.87
STEMI	5.69	11.91	10.21
STEMI	11.24	18.9	7.13
STEMI	10.97	40.92	6.1
STEMI	16.05	49.86	6.6
STEMI	32.78	35.22	15.15
STEMI	1.76	13.32	5.52
STEMI	13.95	29.06	8.87
STEMI	6.84	46.69	8.41
STEMI	48.42	23.21	11.14
STEMI	27.19	25.43	9.35
STEMI	4.47	27.15	10.61
STEMI	39.29	47.72	24.26
STEMI	6.05	19.5	19.25
STEMI	26.33	45.42	3.39
STEMI	24.64	6.76	9.08
STEMI	36.67	47.43	19.07
STEMI	38.03	62.64	25.71
STEMI	20.15	19.49	12.75
CTR	3.62	21.04	12.87
CTR	4.67	10.16	4.76
CTR	0.89	15.44	2.76
CTR	5.87	18.61	6.48
CTR	1.85	24.52	8.98
CTR	0.26	24.98	14.53
CTR	2.67	8.25	6.2
CTR	2.03	19.07	7.69
CTR	1.9	13.71	12.55
CTR	1.77	19.27	10.75
CTR	2.01	30.64	13.25
CTR	0.41	34.73	9.54
CTR	2.09	18.13	9.01
CTR	3.35	16.72	8.23
CTR	1.49	11.39	11.08
CTR	0.65	18.39	4.65
CTR	0.92	9.53	5.22
