# Supplementary material for: Expansion of CD10neg neutrophils and CD14+HLA-DRneg/low monocytes driving proinflammatory responses in patients with acute myocardial infarction
Source: eLife journal article supplement (doi:10.7554/elife.66808), 2021-07-22
Supplement: supp [file elife_poa_e66808_Figure_3_source_data_1.xlsx]

## Sheet: Figure 3-figure supplement 1A
ACS	CD10neg (%)
UA	4.25
UA	0.11
UA	1.71
UA	1.37
UA	0.31
UA	1.64
UA	0.33
UA	4.36
UA	7.16
UA	2.25
UA	4.71
NSTEMI	0.07
NSTEMI	0.88
NSTEMI	0.43
NSTEMI	6.79
NSTEMI	0.56
NSTEMI	0.93
NSTEMI	1.4
NSTEMI	16.05
NSTEMI	2.13
NSTEMI	6.27
NSTEMI	3.97
NSTEMI	22.13
NSTEMI	2.72
NSTEMI	17.41
NSTEMI	10.24
NSTEMI	12.31
STEMI	23.18
STEMI	41.06
STEMI	53.17
STEMI	0.11
STEMI	0.17
STEMI	11.72
STEMI	0.04
STEMI	0.11
STEMI	1.05
STEMI	2.03
STEMI	0.41
STEMI	1.02
STEMI	26.5
STEMI	0.2
STEMI	10.01
STEMI	4.21
STEMI	1.25
STEMI	1.27
STEMI	11.43
STEMI	16.14
STEMI	11.34
STEMI	15.54
STEMI	21.09
STEMI	5.98
STEMI	3.29
STEMI	7.6
STEMI	32
STEMI	3.32
STEMI	30
STEMI	14.39
STEMI	21.58
STEMI	7.73
STEMI	15.81
STEMI	15.43
STEMI	25.72
STEMI	14.55
STEMI	5.12
STEMI	34.21
STEMI	10.97
STEMI	12.86
STEMI	24.48
STEMI	18.09
STEMI	6.9
STEMI	19
CTR	0.57
CTR	0.27
CTR	1.19
CTR	0.06
CTR	0.27
CTR	0.18
CTR	1.01
CTR	0.17
CTR	0.88
CTR	0.45
CTR	0.76
CTR	1.67
CTR	1.41
CTR	0.64
CTR	1.75
CTR	1.56
CTR	0.75
